# Supplementary material for: Inositol Signaling in the Basidiomycete Fungus Schizophyllum commune
Source: MDPI journal article supplement (doi:10.3390/jof7060470), 2021-06-10
Supplement: s1 [file s1]

## Supplemental Material

**Suppl. Tab. S1:** *S. commune* strains used in this study.

| Strain | Genetic background                                                  | Source                                             |
|--------|---------------------------------------------------------------------|----------------------------------------------------|
| 12-43  | <i>ura<sup>-</sup></i>                                              | Jena Microbial Resource Collection (JMRC), Germany |
| T33    | <i>matA3,1;</i><br><i>matB3,2; trp<sup>-</sup>; ura<sup>-</sup></i> | JMRC                                               |
| EVC1   | <i>matA3,1; matB3,2</i>                                             | JMRC                                               |
| OEIMP4 | <i>matA3,1;</i><br><i>matB3,2;</i><br><i>tef1p::imp1</i>            | JMRC                                               |
| OEIMP6 | <i>matA3,1;</i><br><i>matB3,2;</i><br><i>tefp::imp1</i>             | JMRC                                               |

**Suppl. Tab. S2:** Primers used in this study.

| Name  | Gene                                            | Sequence (5'-3')                                               | Length (bp) | Efficiency |
|-------|-------------------------------------------------|----------------------------------------------------------------|-------------|------------|
| p1for | pRS415:: <i>ptef1</i>                           | CTAGTTCTAGAGCGGCCGCCACCGCCGAAAAGAACAAGACGTGT*                  |             |            |
| p1rev | <i>tef1::imp</i>                                | TAGTCGGCGATGGTAAGGTCGGTGGGCATTTTGAGTGTTTCTAAGTGAG*             |             |            |
| p2for | <i>tef1::imp</i>                                | TCACTTAGAAAACACTCAAA ATGCCACCGACCTTACCAT*                      |             |            |
| p2rev | <i>Imp::pRS415</i>                              | CTAAAGGGAACAAAAGCTGGGACACACGAGGATGACGGTT*                      |             |            |
| mio3  | Myo-inositol oxygenase                          | For: GGATCTACAAGCCGCACTGT<br>Rev: CACGGTGCCAGGGATAGAAG         | 149         | 92.80%     |
| imp   | Inositol monophosphatase                        | For: GAAGCCCGTGCTCGGTG<br>Rev: TGGTTGTTGATGCCCTCCGT            |             |            |
| ipp1  | Hypothetical inositol polyphosphate phosphatase | For: GACCGCATAGCGGACTACAAC<br>Rev: TCCATGAGGGAATAGCCCGA        | 188         | 109.95%    |
| act   | Actin-1                                         | For: CTGCTCTTGTATTGACAATGGTTCC<br>Rev: AGGATACCACGCTTGGACTGAGC | 178         | 96.31%     |
| tef   | Translation elongation factor 1a                | For: AGCTCGGCAAGGGTTCCTTCA<br>Rev: AACTTCCAGAGGGCGATATCA       | 97          | 97%        |
| ubi   | Ubiquitin-conjugating-protein                   | For: GAAGGAGTACGATGCGAAGG<br>Rev: TCCTCCTCTGCCTTCTTGC          | 93          | 89.5%      |

\* Overhang for annealing in italics

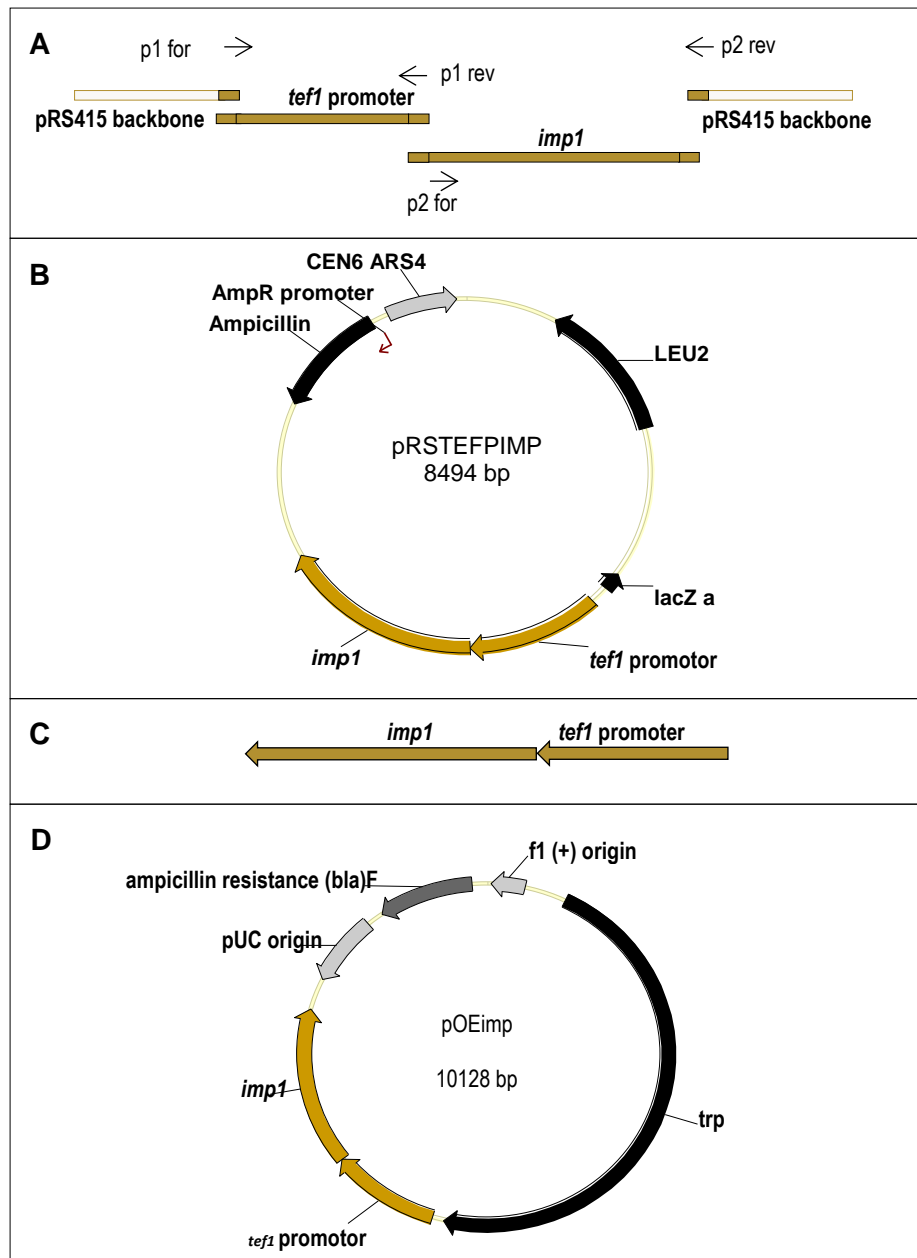

**Suppl. Fig. S1:** Plasmid construction for generation of *imp1* overexpression strains. (A) Recombination in *S. cerevisiae* was carried out using pRS415 to generate the product fusing the PCR products for the *tef1* promoter (*tef1p*) and the *imp1* gene. (B) Overlapping sequences between two adjacent fragments *tef1p* and *imp1* were used (p1rev and p2for). (C) Fusion product *tef1p::imp1* was cloned in pRS415 to generate pRSTFPIIMP. (D) The *tef1p::imp1* region was excised and cloned into pSK containing the selection marker *trp1* to arrive at pOEIMP.

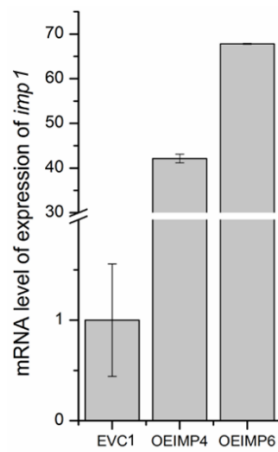

**Suppl. Fig. S2:** Verification of *imp1* overexpression by RT-qPCR. Comparison is given for the empty vector control EVC1 and overexpression transformants OEIMP4 and OEIMP6.

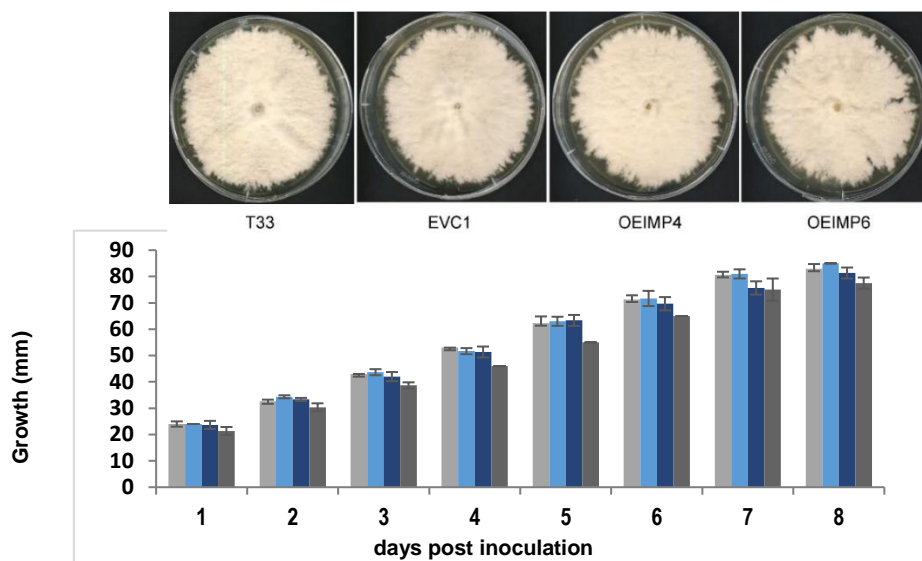

**Suppl. Fig. S3:** Effect of *imp1* overexpression on colony morphology (top) and growth (below) of *S. commune* T33 (grey bars), empty vector control EVC1 (blue), and overexpression transformants OEIMP4 (dark blue) and OEIMP6 (dark grey); n=3.

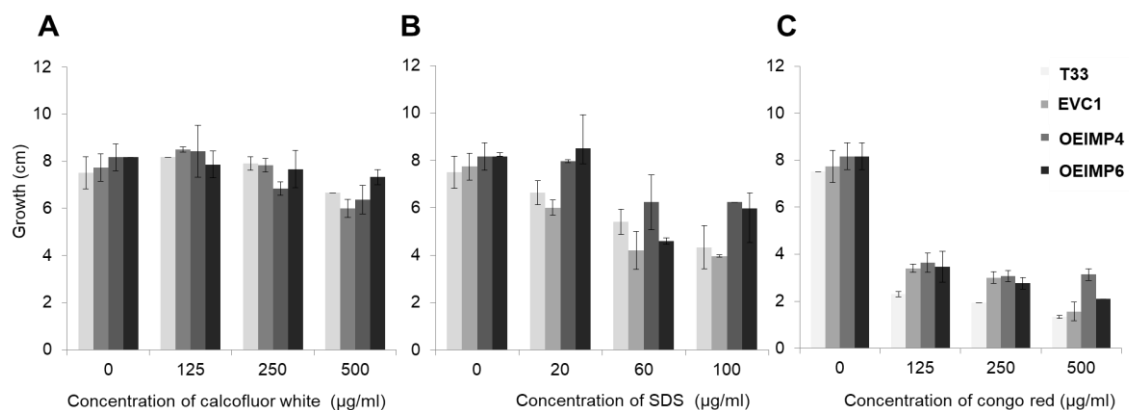

**Suppl. Fig. S4:** Susceptibility towards calcofluor white (A), SDS (B), and Congo red (C). Comparison is given in triplicates for the wildtype parental *S. commune* T33, the empty vector control EVC1, and overexpression transformants OEIMP4 and OEIMP6.

**Suppl. Tab. S3:** Regulation of genes involved in the inositol signalling cycle. The microarray analysis (Erdmann et al., 2012) is showing comparisons between *S. commune* 12-43 grown on CYM *versus* CYM with seepage water from a former mining site (HSW) and co-isogenic *S. commune* W22 grown on CYM with 0.01 mM cadmium nitrate.

|                   | KOG Annotation                                                                                       | Gene Location Scho1            | 12-43 vs. 12-43 HSW |          |   | 12-43 vs. W22 Cd |          |   |
|-------------------|------------------------------------------------------------------------------------------------------|--------------------------------|---------------------|----------|---|------------------|----------|---|
|                   |                                                                                                      |                                | x-fold              | p-value  | Q | x-fold           | p-value  | Q |
| PIS               | KOG3240: PI synthase                                                                                 | estExt_fgenes1_pm.C_20467      | -1.45               | 1.79E-01 | 1 | 2.11             | 1.16E-02 | 1 |
|                   | KOG0693: Myo-inositol-1-phosphate synthase                                                           | estExt_fgenes1_pm.C_70303      | 1.25                | 4.55E-01 | 1 | 2.45             | 6.76E-03 | 1 |
|                   |                                                                                                      | estExt_fgenes1_pm.C_70303      | 2.00                | 2.81E-03 | 1 | -2.50            | 2.52E-04 | 1 |
|                   |                                                                                                      | estExt_fgenes1_pm.C_70303      | 1.08                | 6.86E-01 | 1 | -1.50            | 3.75E-02 | 1 |
| PI <sub>4</sub> K | KOG2381: PI4-kinase                                                                                  | augustus-scaffold_8.g641       | 2.24                | 1.21E-01 | 1 | 4.61             | 6.59E-03 | 1 |
|                   |                                                                                                      | e_gw1.2.405.1                  | 1.25                | 4.86E-01 | 1 | 2.81             | 3.84E-03 | 1 |
|                   | KOG0903: PI4-kinase, involved in intracellular trafficking and secretion,                            | estExt_Genewise1Plus.C_21667   | 3.82                | 9.87E-02 | 0 | 1.73             | 4.86E-01 | 0 |
|                   |                                                                                                      |                                |                     |          |   |                  |          |   |
| PI <sub>5</sub> K | KOG0230: PI-4-phosphate 5-kinase and related FYVE finger-containing proteins                         | estExt_fgenes1_kg.C_60138      | -1.75               | 6.41E-02 | 1 | 1.07             | 8.11E-01 | 1 |
|                   |                                                                                                      | estExt_Genewise1.C_12180       | 1.04                | 8.60E-01 | 1 | 3.04             | 1.67E-04 | 1 |
|                   | KOG0229: PI-4-phosphate 5-kinase                                                                     | estExt_fgenes1_kg.C_110031     | 2.41                | 1.38E-02 | 1 | 1.75             | 9.89E-02 | 1 |
|                   |                                                                                                      |                                |                     |          |   |                  |          |   |
| PI <sub>3</sub> K | KOG0906: PI3-kinase VPS34, involved in signal transduction,                                          | fgenes1_pm.C_scaffold_500027 2 | -1.08               | 8.16E-01 | 1 | 1.34             | 3.56E-01 | 1 |
|                   |                                                                                                      |                                |                     |          |   |                  |          |   |
| PLC               | KOG0169: PI-specific phospholipase C                                                                 | estExt_Genewise1.C_170034      | 1.30                | 2.09E-01 | 1 | -1.06            | 7.71E-01 | 1 |
|                   |                                                                                                      | estExt_fgenes1_pm.C_60287      | 1.18                | 4.20E-01 | 1 | 1.83             | 9.07E-03 | 1 |
|                   |                                                                                                      | augustus-scaffold_6.g78        | -1.81               | 2.19E-01 | 1 | -1.00            | 1.00E+00 | 1 |
|                   |                                                                                                      | augustus-scaffold_3.g897       | -4.17               | 5.43E-02 | 1 | 2.59             | 1.87E-01 | 0 |
| PKC               | KOG2397: Protein kinase C substrate, 80 KD protein, heavy chain                                      | estExt_Genewise1Plus.C_11897   | -1.11               | 7.10E-01 | 1 | 2.56             | 4.35E-03 | 1 |
|                   |                                                                                                      |                                |                     |          |   |                  |          |   |
| IMK               | KOG1620: Inositol polyphosphate multikinase, component of the ARGR transcription regulatory complex, | e_gw1.1.1005.1                 | 1.79                | 5.90E-01 | 1 | 6.94             | 8.66E-02 | 1 |
|                   | KOG4749: Inositol polyphosphate kinase                                                               | estExt_Genewise1Plus.C_10042 7 | -15.82              | 5.24E-03 | 1 | -2.71            | 2.63E-01 | 1 |
|                   |                                                                                                      | e_gw1.2.893.1                  | -13.45              | 2.05E-03 | 1 | -6.98            | 1.46E-02 | 1 |
|                   |                                                                                                      |                                |                     |          |   |                  |          |   |
| IP <sub>3</sub> P | KOG1089: Myotubularin-related PI3-phosphate 3-phosphatase MTM6                                       | estExt_fgenes1_pm.C_20581      | 3.88                | 2.81E-02 | 1 | 2.11             | 2.04E-01 | 1 |
| IP <sub>4</sub> P |                                                                                                      |                                |                     |          |   |                  |          |   |
| IP <sub>5</sub> P | KOG0565: Inositol polyphosphate 5-phosphatase and related proteins                                   | estExt_fgenes1_pm.C_20547      | 1.35                | 7.50E-01 | 1 | 7.38             | 4.55E-02 | 1 |
|                   |                                                                                                      | estExt_Genewise1.C_170073      | -1.20               | 4.45E-01 | 1 | 1.13             | 6.01E-01 | 1 |
|                   |                                                                                                      | augustus-scaffold_5.g421       | -9.43               | 1.26E-01 | 1 | -5.25            | 2.51E-01 | 1 |
|                   |                                                                                                      | estExt_fgenes2_pg.C_100071     | -8.56               | 1.58E-04 | 1 | -12.9            | 2.38E-05 | 1 |
| IPP               | KOG1382: Multiple inositol polyphosphate phosphatase                                                 | gw1.1.3820.1                   | 1.86                | 1.58E-01 | 1 | 1.96             | 1.29E-01 | 1 |
|                   |                                                                                                      | gw1.8.732.1                    | 1.55                | 2.01E-01 | 1 | 2.12             | 3.59E-02 | 1 |
|                   |                                                                                                      | estExt_Genewise1Plus.C_30697   | 1.35                | 4.05E-01 | 1 | -2.21            | 3.69E-02 | 1 |
|                   |                                                                                                      | e_gw1.7.1022.1                 | -1.62               | 5.16E-01 | 1 | -1.10            | 9.02E-01 | 1 |

|     | KOG Annotation                                                                              | Gene Location Scho1      | 12-43 vs. 12-43 HSW |          |   | 12-43 vs. W22 Cd |          |   |
|-----|---------------------------------------------------------------------------------------------|--------------------------|---------------------|----------|---|------------------|----------|---|
|     |                                                                                             |                          | x-fold              | p-value  | Q | x-fold           | p-value  | Q |
| ITP | KOG0566: Inositol-1,4,5-triphosphate 5-phosphatase (synaptojanin), INP51/INP52/INP53 family | estExt_Genewise1.C_11249 | -9.00               | 4.61E-02 | 1 | -14.53           | 1.79E-02 | 1 |
| IMP | KOG2951: Inositol monophosphatase                                                           | e_gw1.1.586.1            | 1.33                | 4.63E-01 | 1 | 1.12             | 7.67E-01 | 1 |
|     |                                                                                             | e_gw1.1.586.1            | -1.05               | 8.93E-01 | 1 | -1.48            | 2.59E-01 | 1 |
|     |                                                                                             | e_gw1.1.586.1            | -1.30               | 2.04E-01 | 1 | -1.20            | 3.79E-01 | 1 |

**Suppl. Tab. S4:** Intracellular trafficking associated proteins regulated in *imp1* overexpressing transformant pOEIMP4 vs. EVC

| ID      | x-fold | KOG class and description                                       |                                                                                                              | BLAST hit, organism, % identity                                                                                      |
|---------|--------|-----------------------------------------------------------------|--------------------------------------------------------------------------------------------------------------|----------------------------------------------------------------------------------------------------------------------|
| 2598708 | 2.9    | cyto-skeleton                                                   | Drebrins and related actin binding proteins                                                                  | Actin-binding related protein, <i>Laccaria bicolor</i> , 70%                                                         |
| 2541047 | 2.7    |                                                                 | Kinesin-like protein                                                                                         | Kinesin-like protein, <i>Armillaria solidipes</i> , 78%                                                              |
| 2674409 | 2.3    |                                                                 | Predicted actin-bundling protein                                                                             | Protein FRG1, <i>Hypsizygus marmoreus</i> , 68%                                                                      |
| 2681330 | 2.3    |                                                                 | Predicted actin-bundling protein                                                                             | Ubiquitin-activating enzyme E1-like, <i>Trametes pubescens</i> , 63%                                                 |
| 2704529 | 23.8   | intra-cellular traf-ficking, secretion, and vesicular transport | Signal recognition particle, subunit Srp19                                                                   | Signal recognition particle, SRP19 subunit, <i>Armillaria solidipes</i> , 61%                                        |
| 2262522 | 23.7   |                                                                 | Protein involved in glucose derepression and pre-vacuolar endosome protein sorting                           | Snf7-domain-containing protein, <i>Armillaria solidipes</i> , 74%                                                    |
| 2603193 | 21.7   |                                                                 | Mitochondrial Fe/S cluster exporter, ABC superfamily                                                         | Iron-sulfur clusters transporter ATM1, <i>Coprinopsis cinerea okayama</i> , 75%                                      |
| 2597192 | 21.7   |                                                                 | Golgi transport complex subunit                                                                              | Dor1-domain-containing protein, <i>Armillaria gallica</i> , 48%                                                      |
| 2678633 | 4.3    |                                                                 | Vesicle coat complex AP-3, beta subunit                                                                      | acyltransferase ChoActase/COT/CP, <i>Fistulina hepatica</i> , 60%                                                    |
| 2693248 | 3.5    |                                                                 | Signal recognition particle, subunit Srp72                                                                   | Signal recognition particle subunit SRP72, <i>Trametes pubescens</i> , 47%                                           |
| 2460397 | 3.0    |                                                                 | Mitochondrial import inner membrane translocase, subunit TIM8                                                | Mitochondrial import inner membrane translocase <i>Heterobasidion irregulare</i> , 68%                               |
| 2700443 | 3.0    |                                                                 | Guanine nucleotide exchange factor                                                                           | Sec7 guanine nucleotide exchange factor, <i>Moniliophthora roreri</i> , 72%                                          |
| 1185145 | 2.4    |                                                                 | Vacuolar assembly/sorting protein DID2                                                                       | Vacuolar protein sorting protein 46, <i>Moniliophthora roreri</i> , 90%                                              |
| 2698910 | 2.2    |                                                                 | Membrane coat complex Retromer, subunit VPS5/SNX1, Sorting nexins, and related PX domain-containing proteins | PX-domain-containing protein, <i>Armillaria gallica</i> , 75%<br>Sorting nexin-41, <i>Hypsizygus marmoreus</i> , 76% |
| 2678145 | 2.1    |                                                                 | Cysteine protease required for autophagy - Apg4p/Aut2p                                                       | Thiamine pyrophosphokinase, <i>Coprinopsis cinerea okayama</i> , 49%                                                 |
| 2007874 | 2.1    |                                                                 | Nuclear transport factor 2                                                                                   | Nuclear transport factor 2, <i>Neolentinus lepideus</i> , 75%                                                        |
| 2595664 | 2.1    |                                                                 | SNARE protein Syntaxin 1 and related proteins                                                                | t-SNARE, <i>Armillaria solidipes</i> , 80%                                                                           |
| 2573839 | 2.2    | poorly characterized                                            | Vacuolar sorting protein VPS1, dynamin, and related proteins                                                 | Dynamin protein dnm1, <i>Moniliophthora roreri</i> MCA 2997, 75%                                                     |

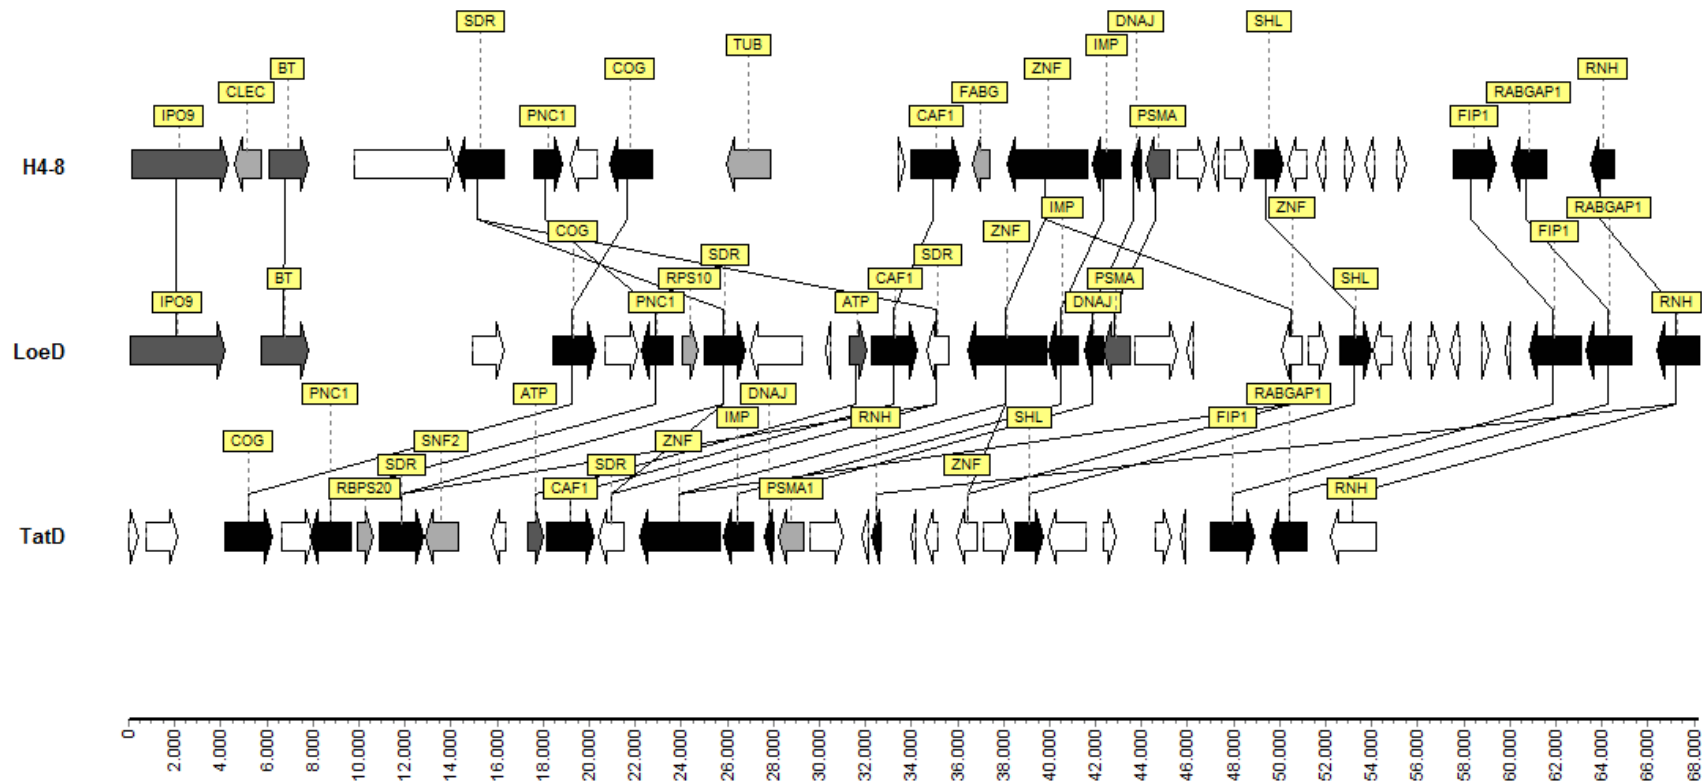

**Suppl. Fig. S5:** Chromosomal map of *imp1* surrounding genes in three different strains *S. commune*, H4-8, LoeD, and TatD. White arrows indicate unknown genes, black arrows show that the corresponding genes are present in all three genomes.
